# Supplementary material for: Selective carboxylation versus layer-by-layer unsheathing of multi-walled carbon nanotubes: new insights from the reaction with boiling nitrating mixture
Source: Royal Society of Chemistry journal article supplement (doi:10.1039/c9ra08300f), 2019-01-01
Supplement: c9ra08300f1.pdf [file c9ra08300f1.pdf]

Electronic Supplementary Information

*for*

**Selective carboxylation *versus* layer-by-layer unsheathing of multi-walled carbon nanotubes:  
new insights from the reaction with boiling nitrating mixture**

by

Anna Kolanowska,<sup>a</sup> Patrycja Wąsik,<sup>a</sup> Wojciech Zięba,<sup>b</sup> Artur Piotr Terzyk<sup>b</sup> and Sławomir Boncel<sup>\*a</sup>

<sup>a</sup> Department of Organic Chemistry, Bioorganic Chemistry and Biotechnology, Silesian University of Technology, Krzywoustego 4, 44-100 Gliwice, Poland

<sup>b</sup> Faculty of Chemistry, Physicochemistry of Carbon Materials Research Group, Nicolaus Copernicus University in Toruń, Gagarin Street 7, 87-100 Toruń, Poland

**Table S1** Correlation between functionalization degrees determined by TGA and Boehm titration

| Time, min | COOH concentration, mmol/g |                 |
|-----------|----------------------------|-----------------|
|           | TGA                        | Boehm titration |
| 5         | 1.8                        | 1.4             |
| 10        | 3.2                        | 2.8             |
| 15        | 4.7                        | 4.0             |
| 30        | 3.1                        | 2.7             |
| 45        | 2.2                        | 1.9             |
| 60        | 3.9                        | 3.4             |
| 75        | 4.9                        | 4.2             |
| 90        | 3.0                        | 2.7             |

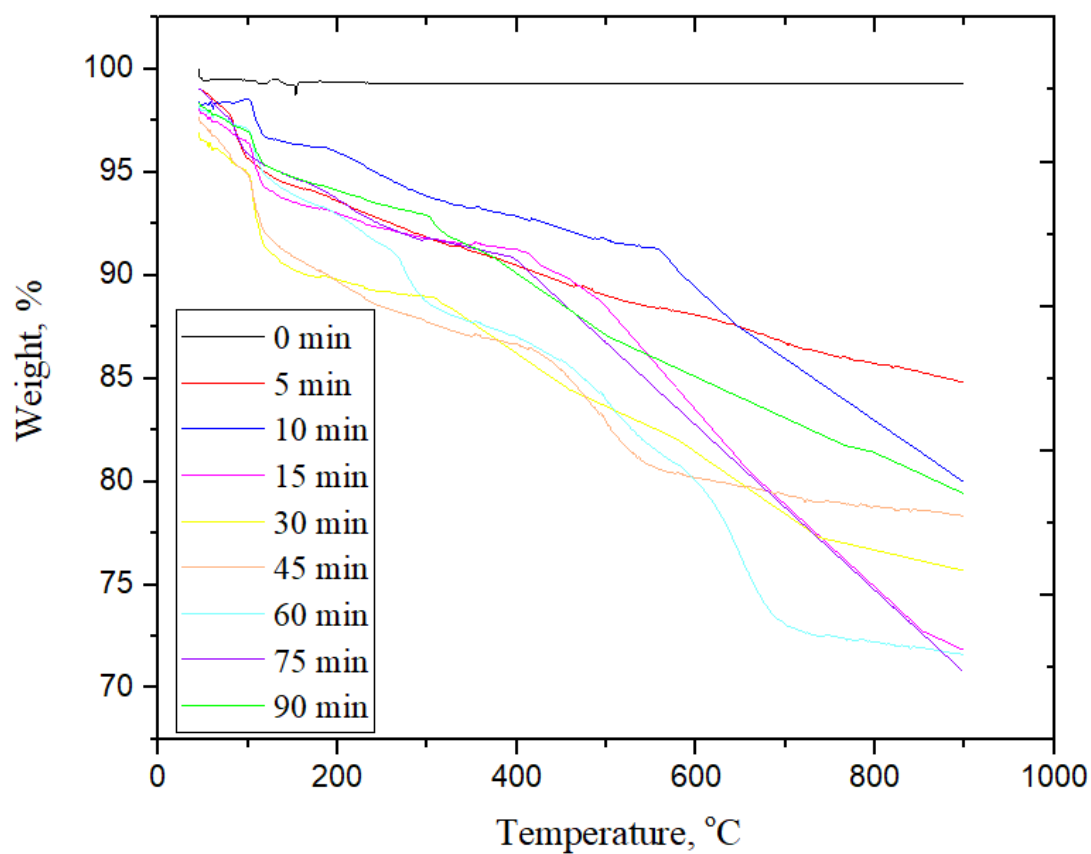

**Fig. S1** Collective TGA curves for MWCNTs and products of their oxidation (O-MWCNTs) – all curves were presented separately in **Fig. S2**

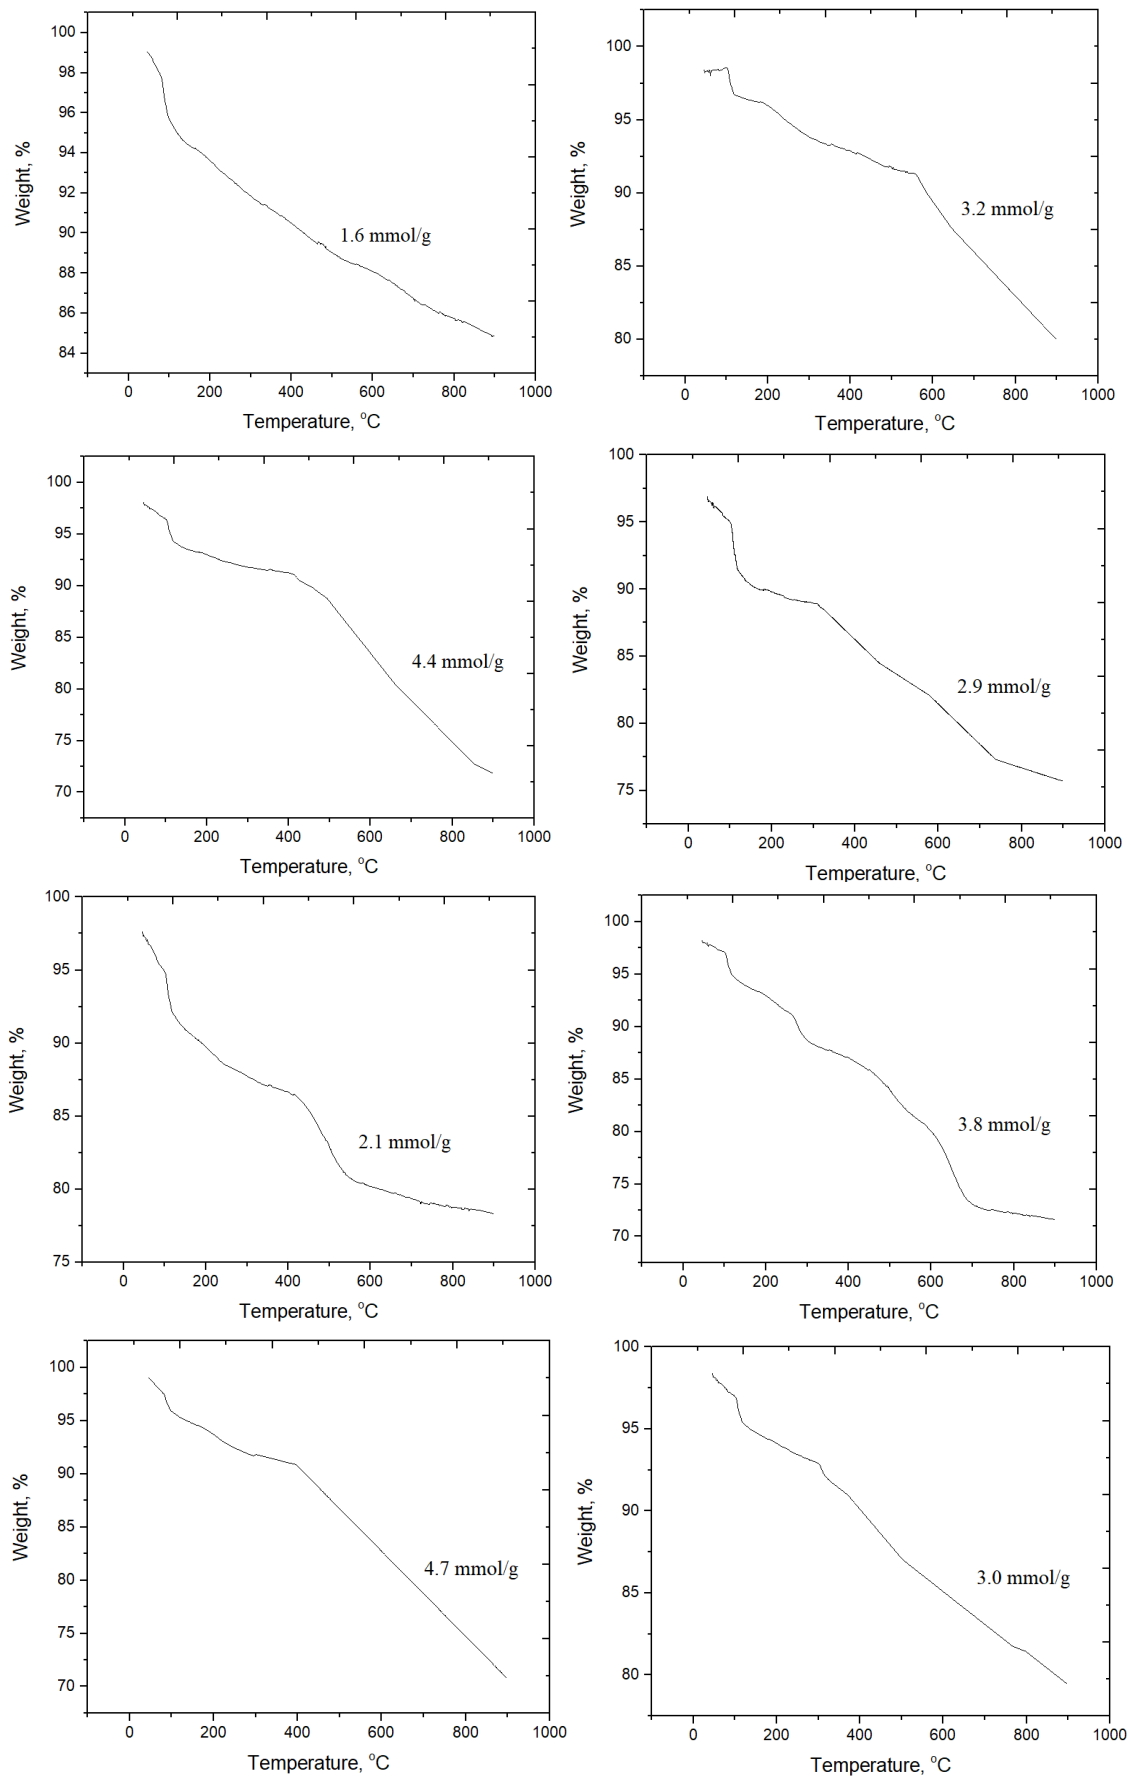

Fig. S2 TGA curves for all O-MWCNTs products: t=0, 5, 10, 15, 30, 45, 60, 75 and 90 min

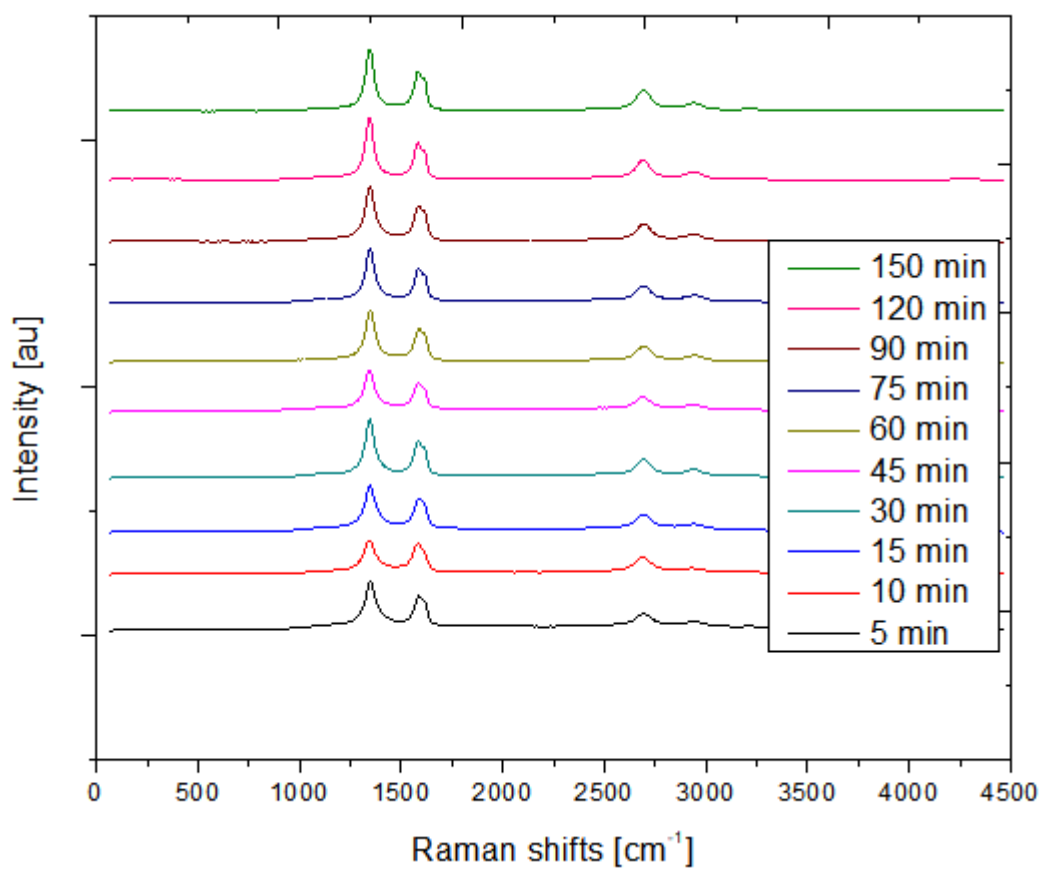

**Fig. S3** Raman spectra of all O-MWCNTs as the source data for preparation of **Fig. 3C**
